# Supplementary material
Source: PubMed Central journal article supplement (PMC4674814)

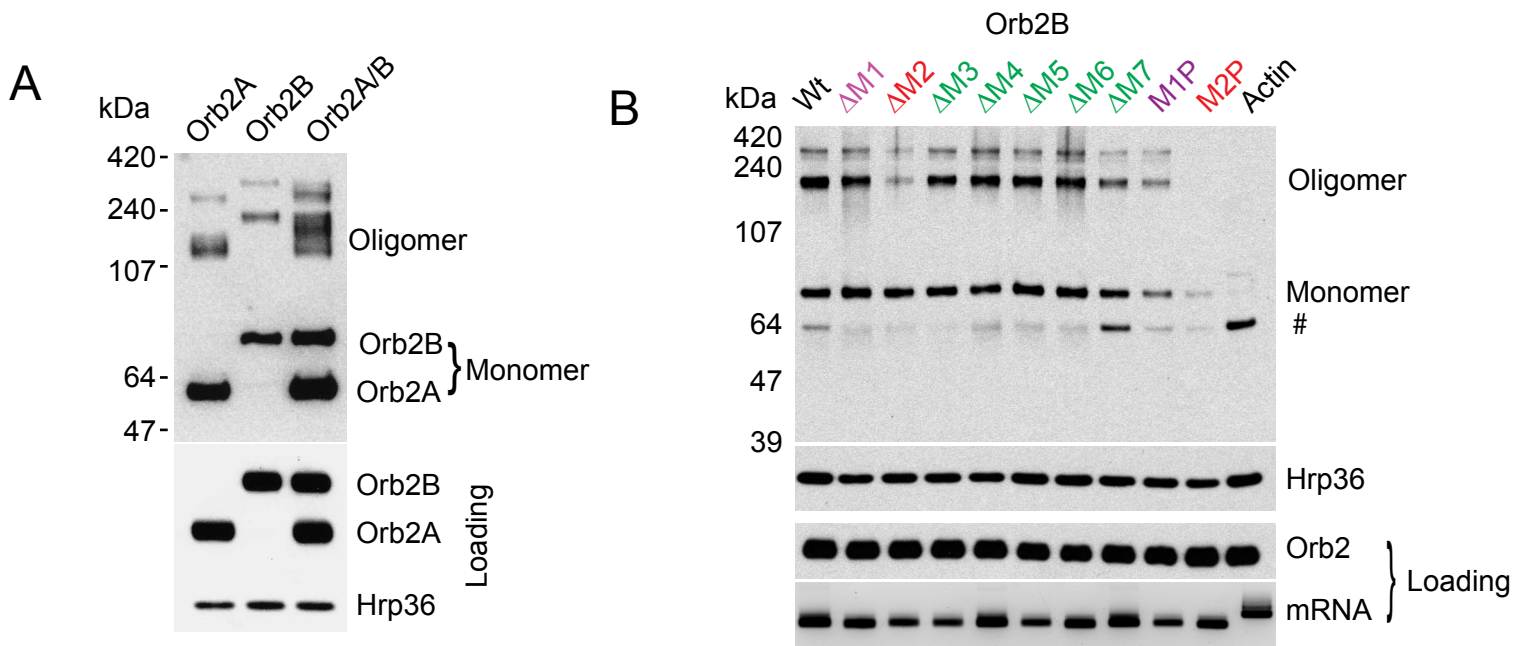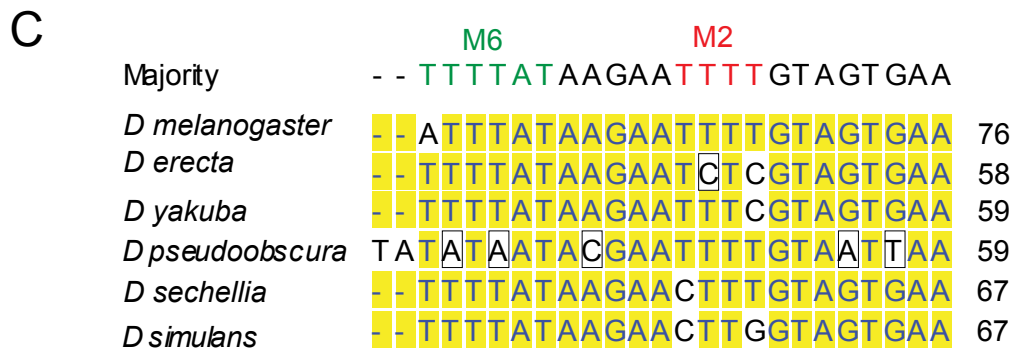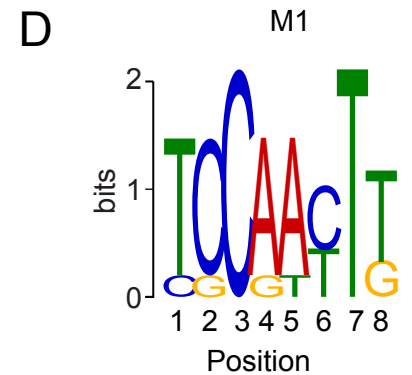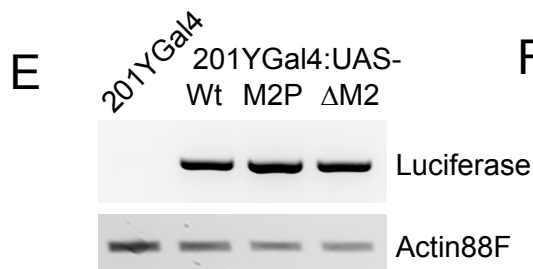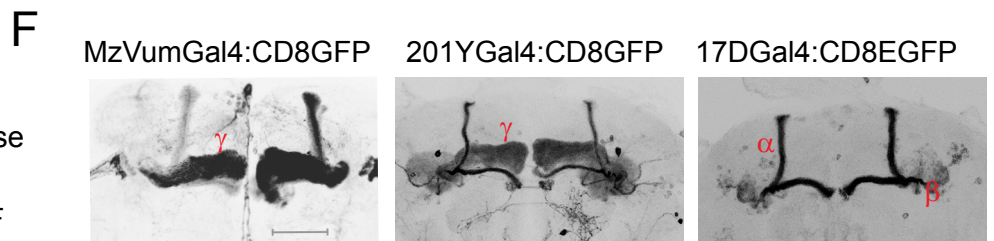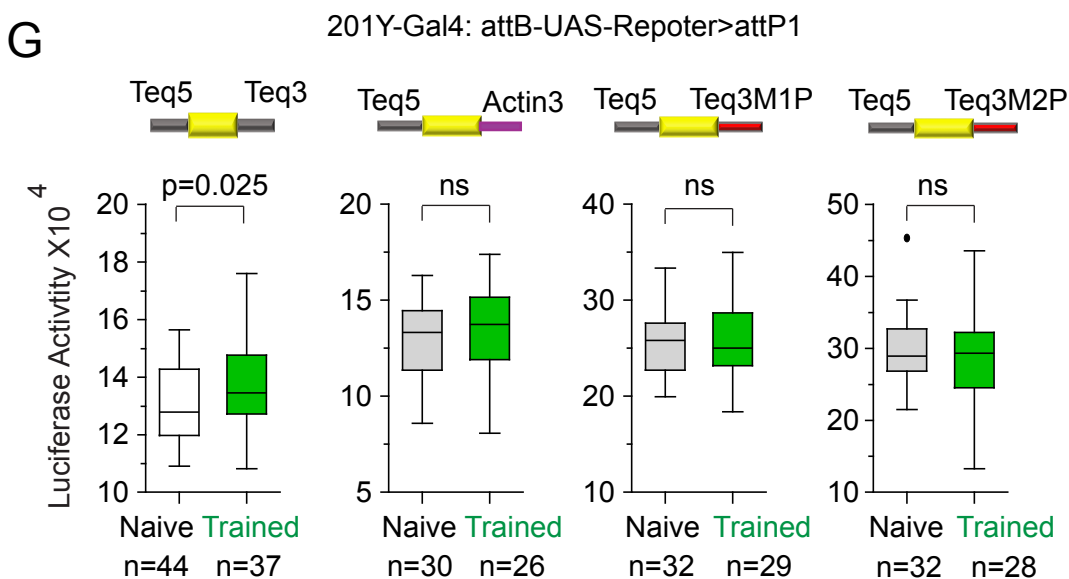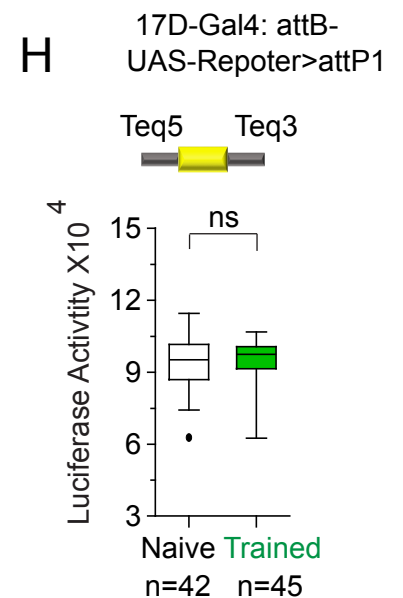

Supplement: NIHMS738409-supplement-1.pdf [file NIHMS738409-supplement-1.pdf]

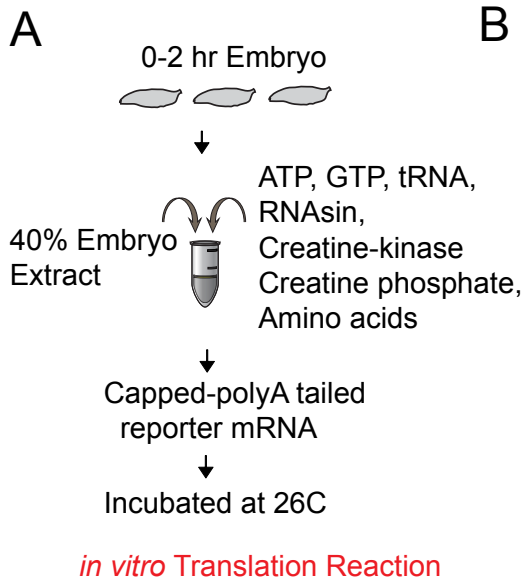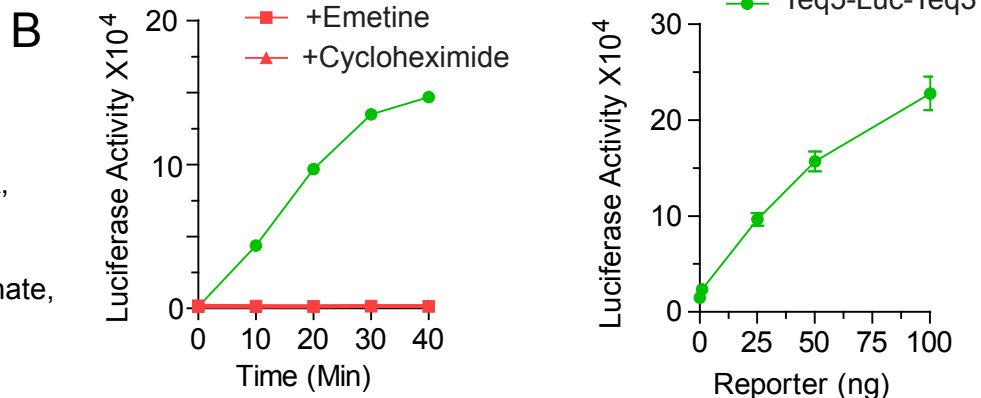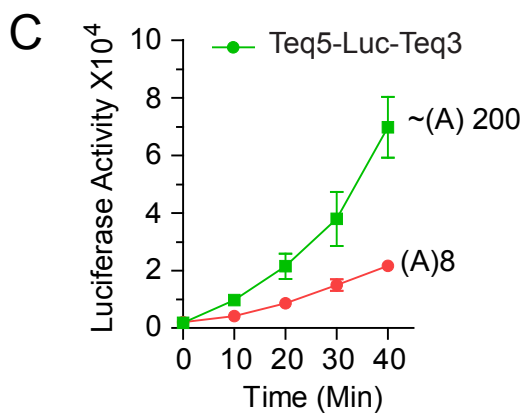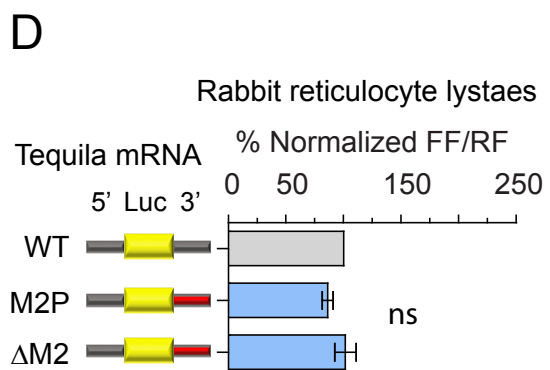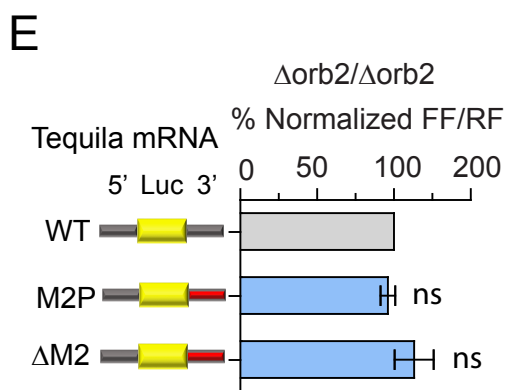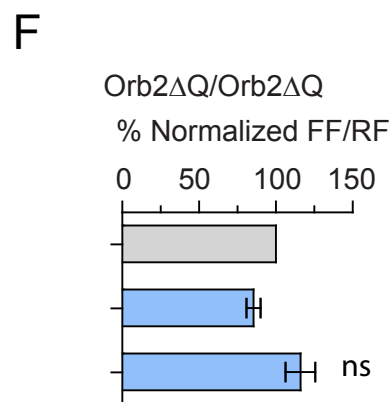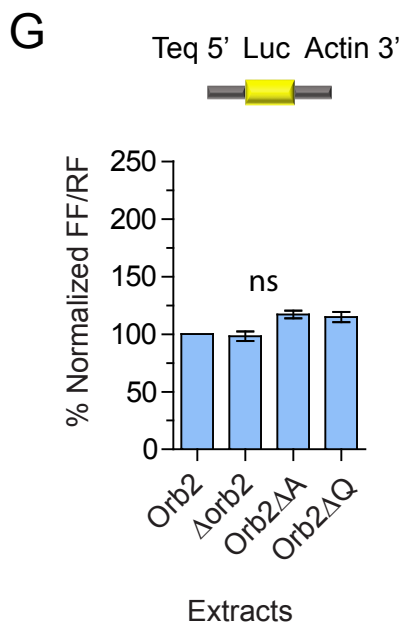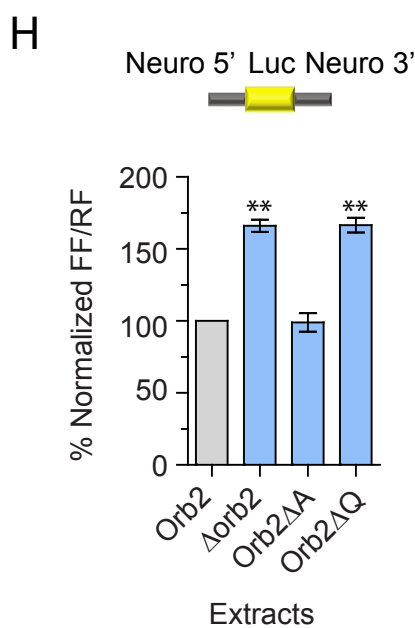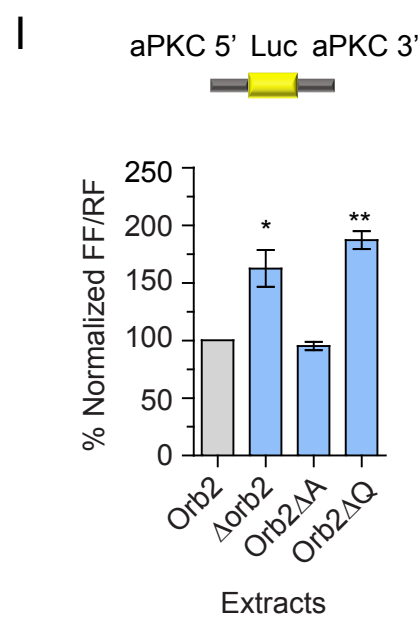

Supplement: NIHMS738409-supplement-2.pdf [file NIHMS738409-supplement-2.pdf]

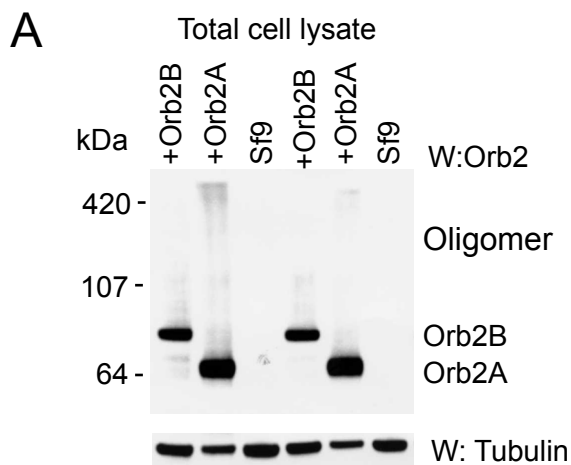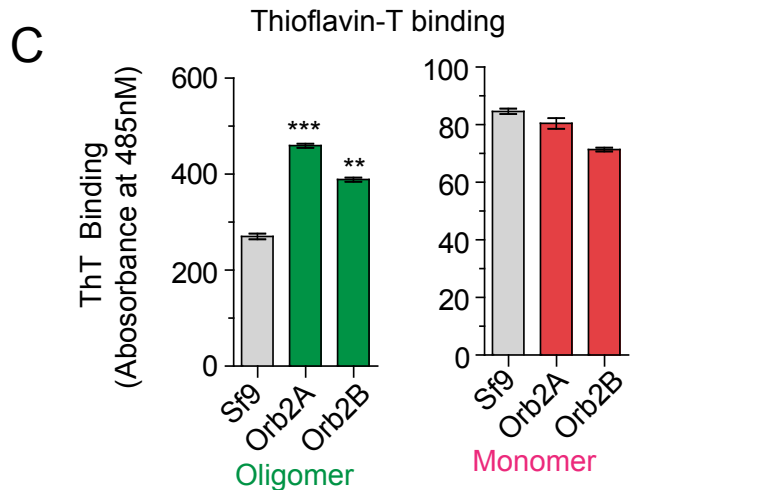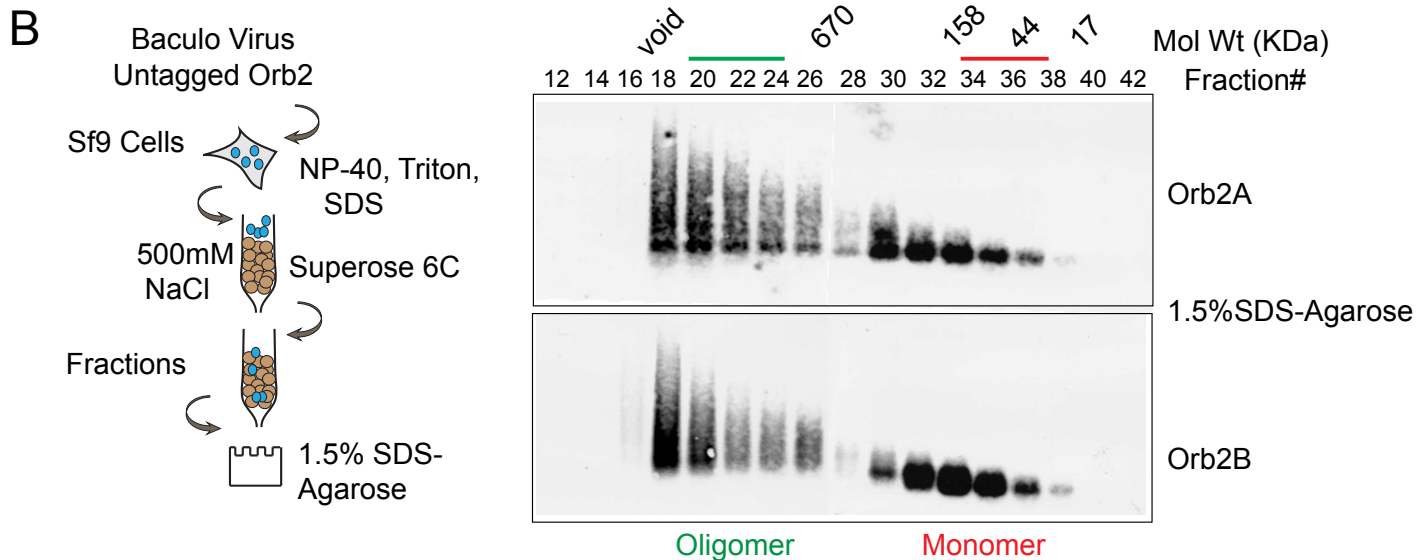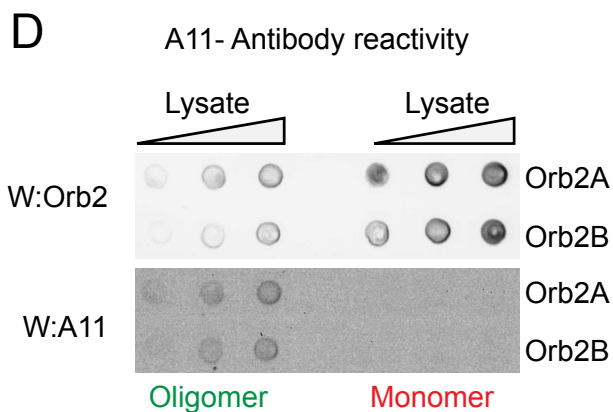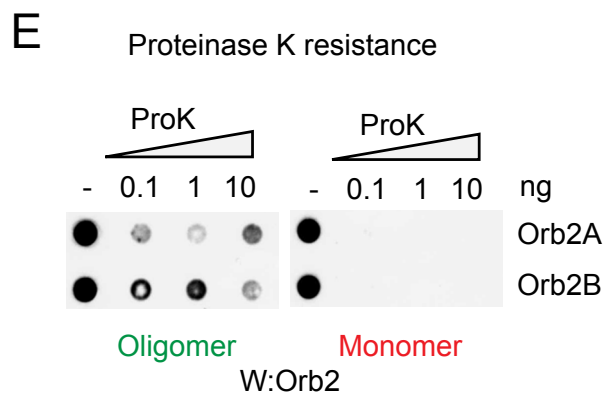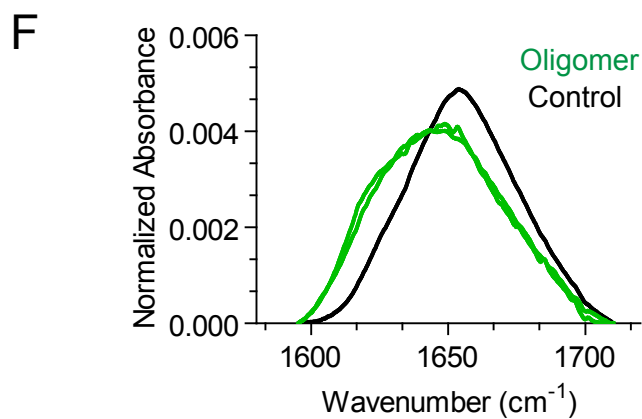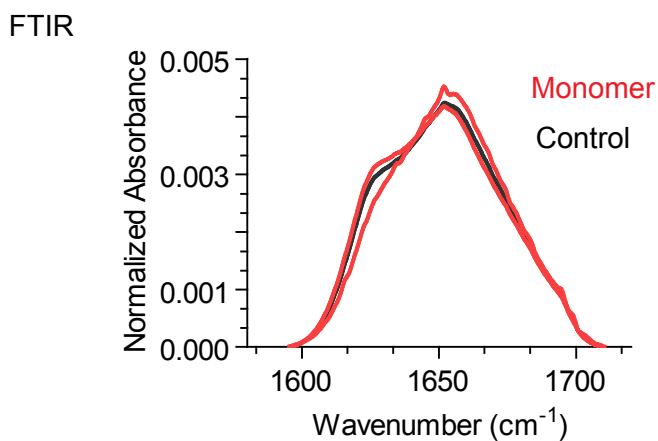

Supplement: NIHMS738409-supplement-3.pdf [file NIHMS738409-supplement-3.pdf]

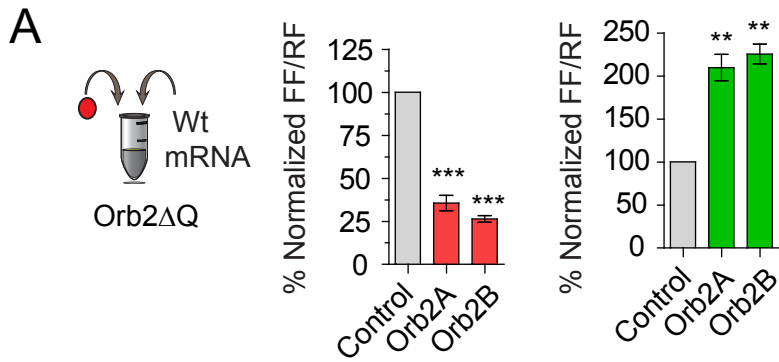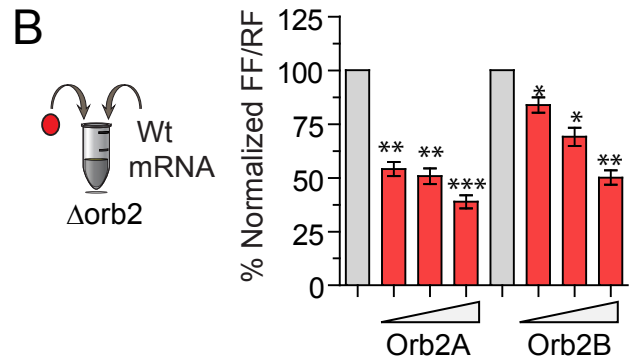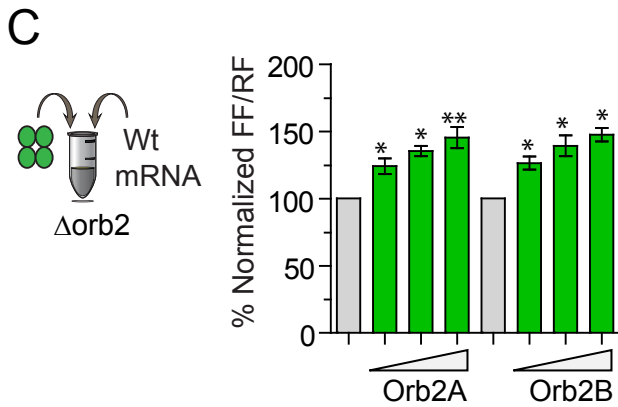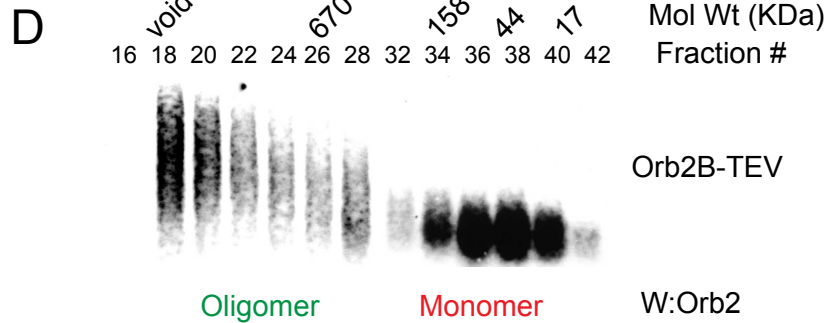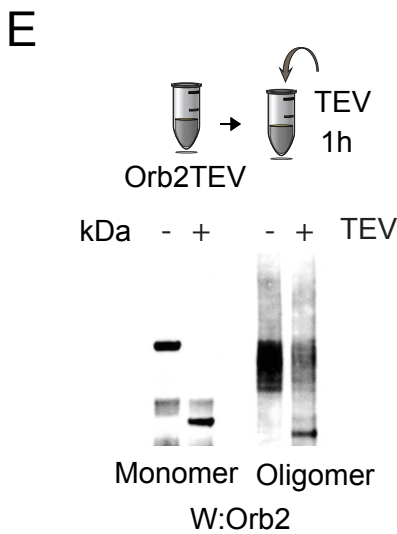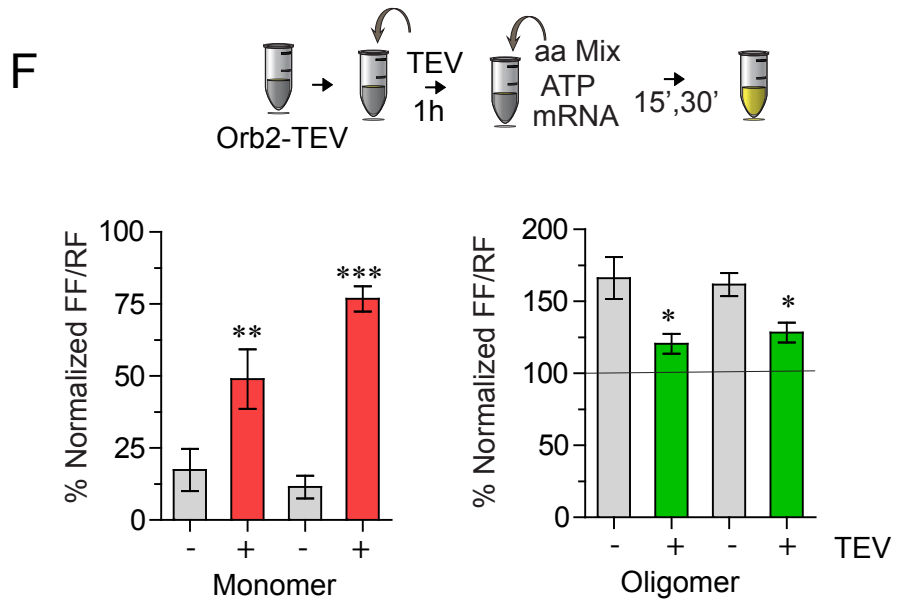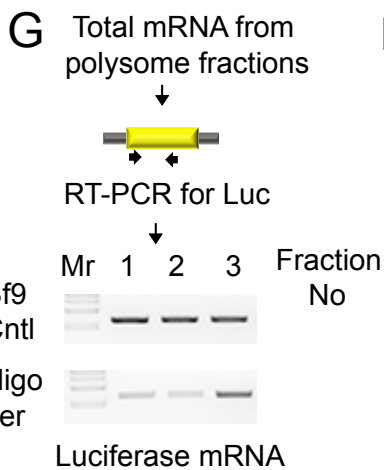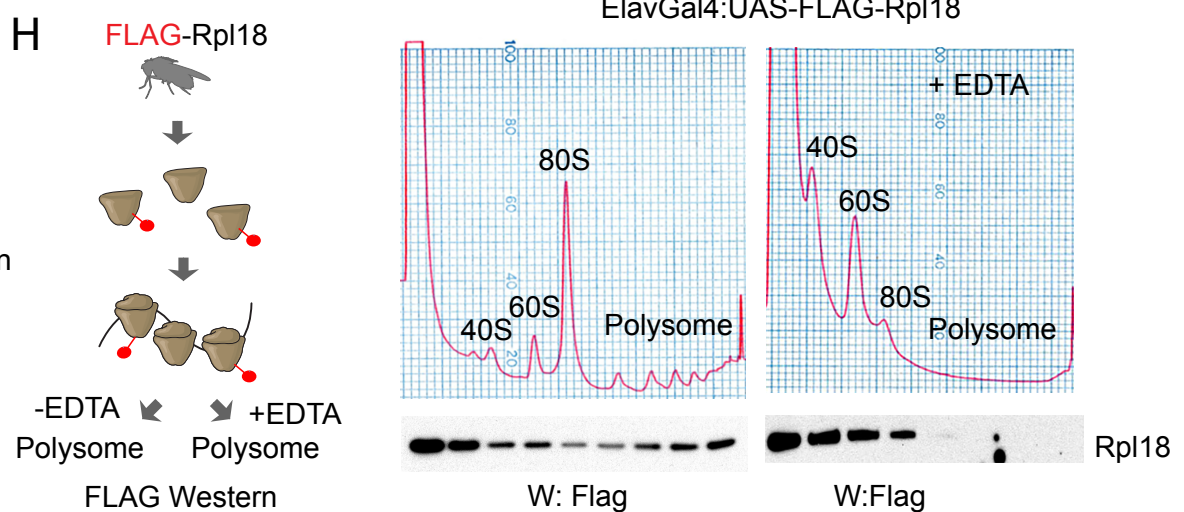

Supplement: NIHMS738409-supplement-4.pdf [file NIHMS738409-supplement-4.pdf]

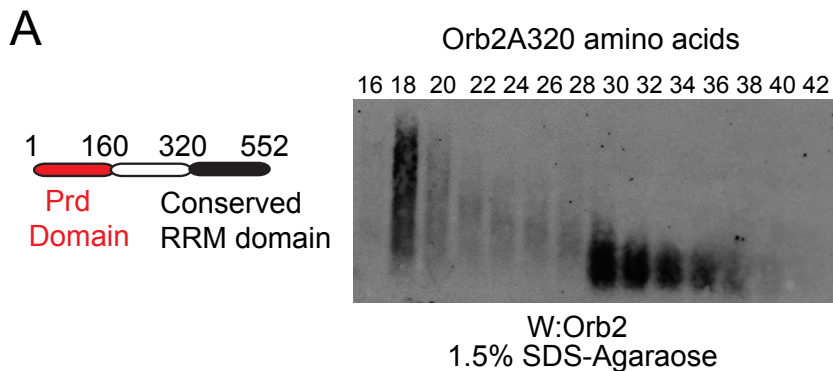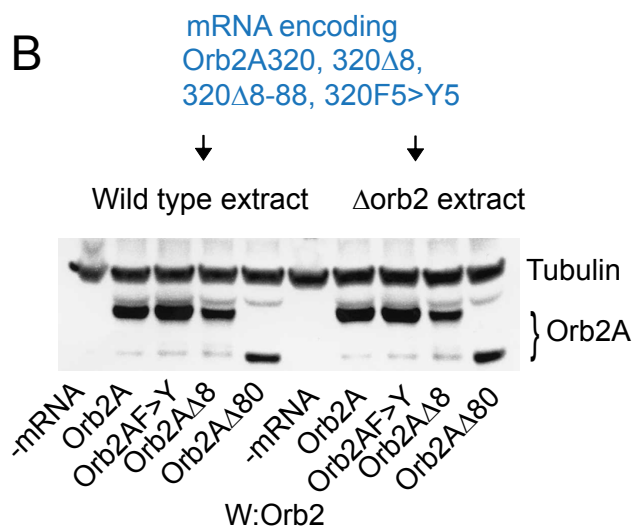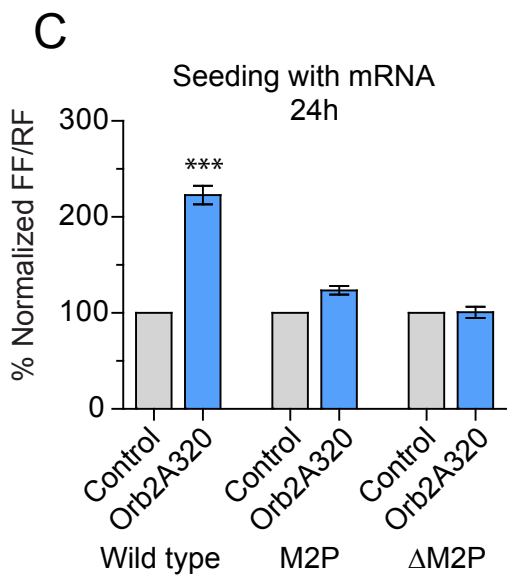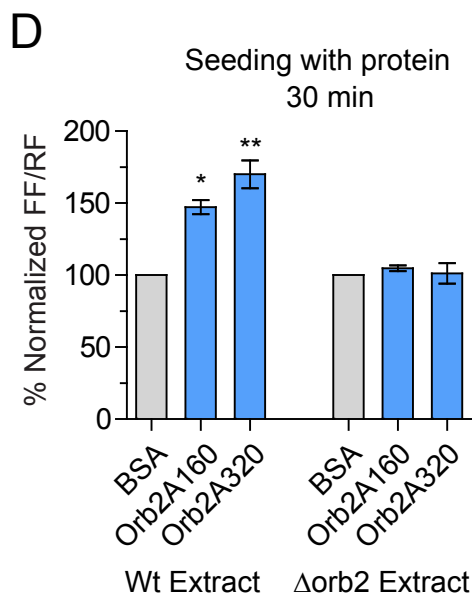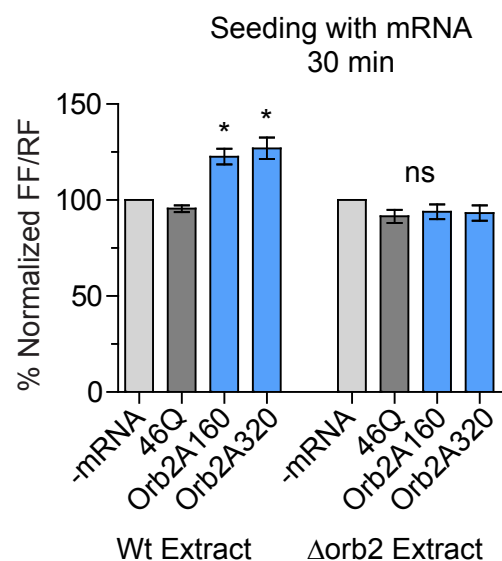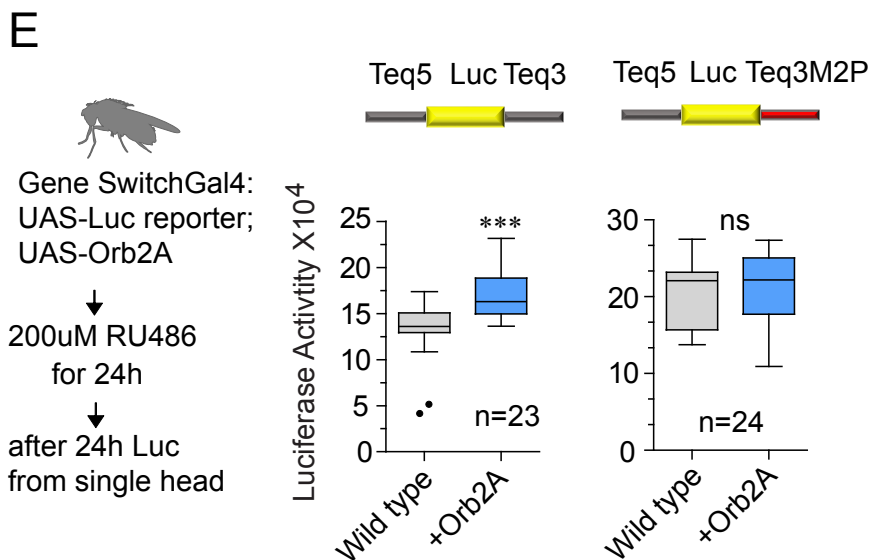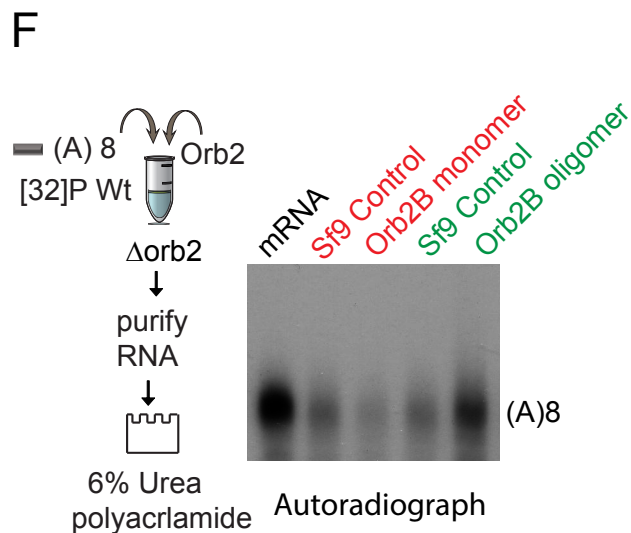

Supplement: NIHMS738409-supplement-5.pdf [file NIHMS738409-supplement-5.pdf]

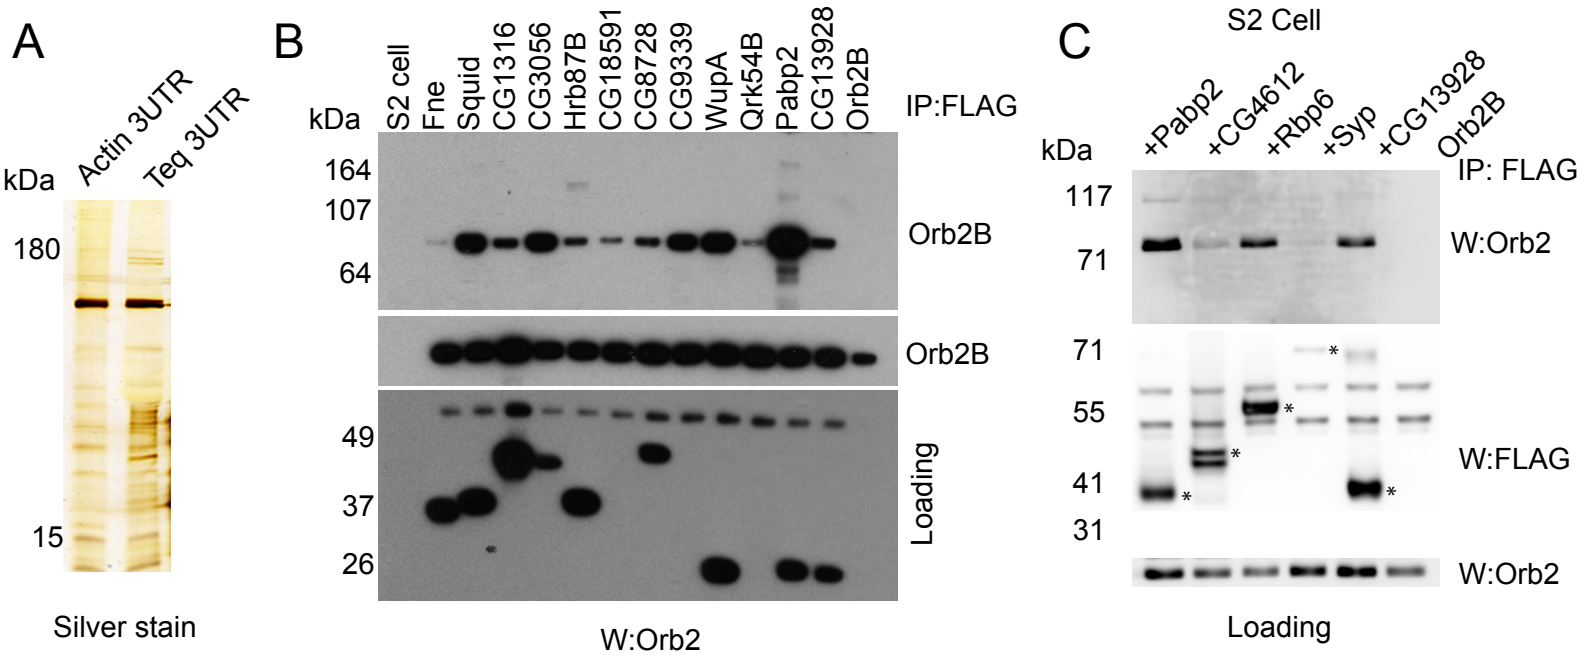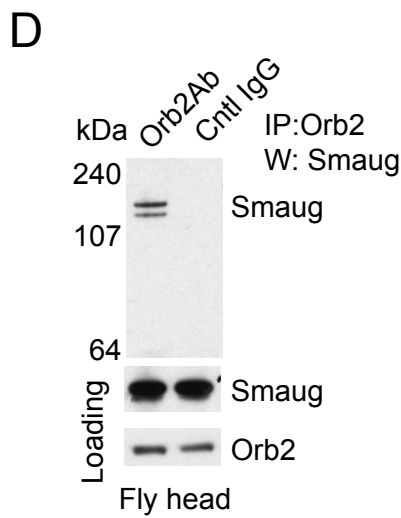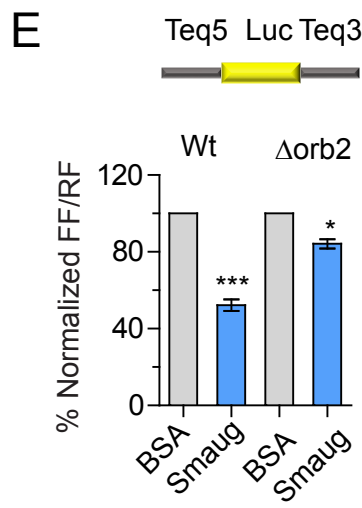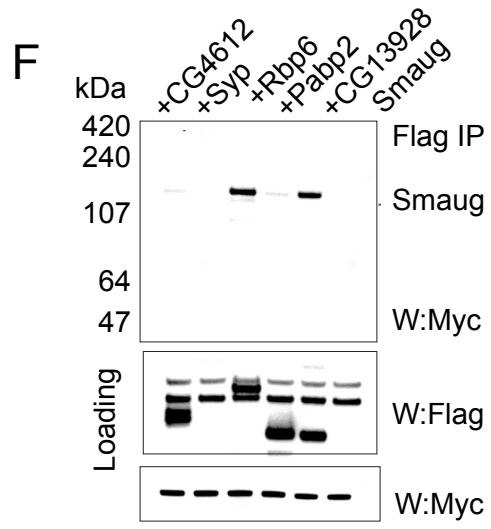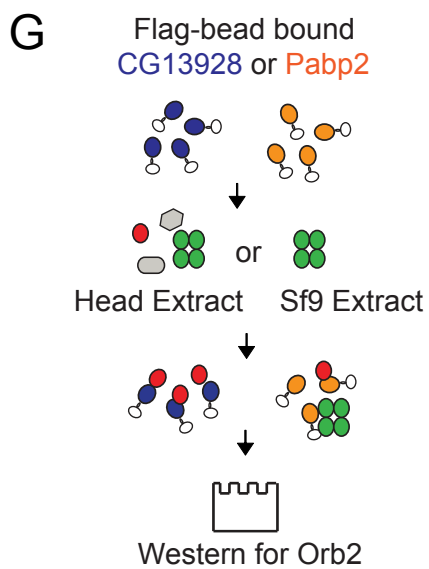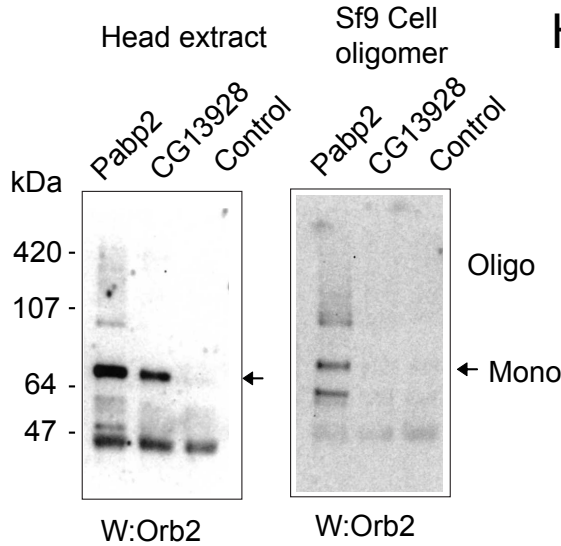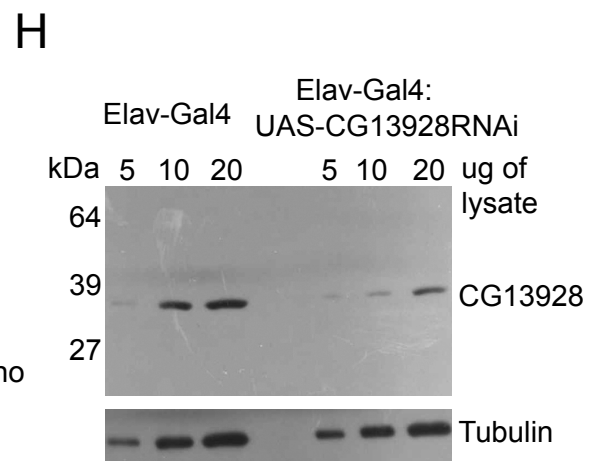

Supplement: NIHMS738409-supplement-6.pdf [file NIHMS738409-supplement-6.pdf]

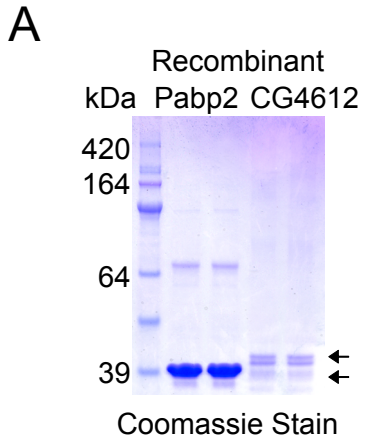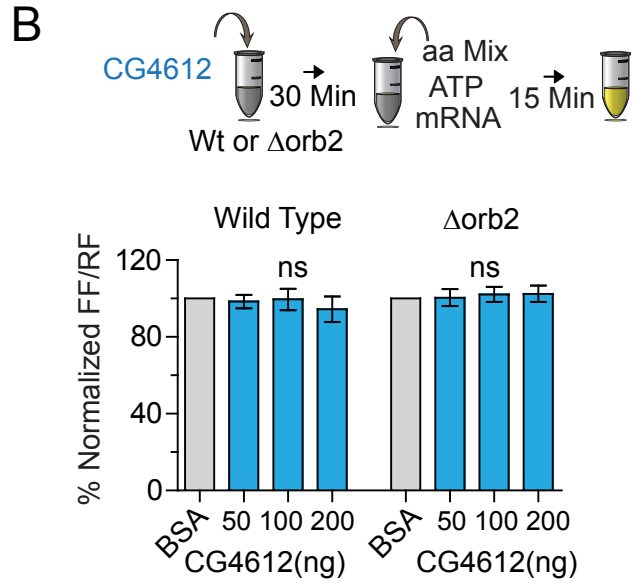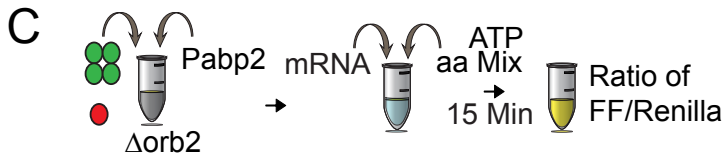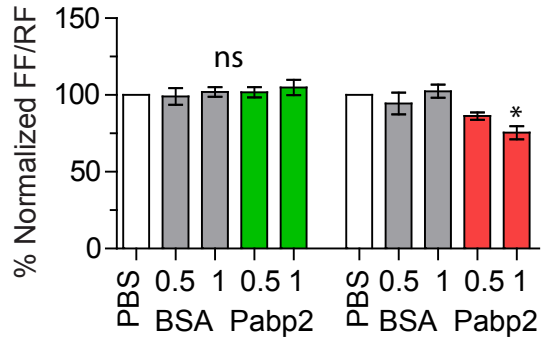

- D**
- 1) ElavGal4
  - 2) UAS-CG4612RNAi
  - 3) ElavGal4:UAS-CG4612RNAi

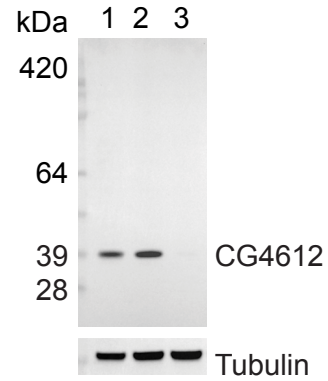

Supplement: NIHMS738409-supplement-7.pdf [file NIHMS738409-supplement-7.pdf]
